# Supplementary material
Source: PubMed Central journal article supplement (PMC6941179)

# **A benchmark for homomeric enzyme active site structure prediction highlights the importance of accurate modeling of protein symmetry.**

Stephanie C. Contreras<sup>1</sup>, Steve J. Bertolani<sup>1</sup>, Justin B. Siegel<sup>1,2,3\*</sup>

1. Department of Chemistry, University of California, Davis, Davis, California, United States of America

2. Department of Biochemistry and Molecular Medicine, University of California, Davis, California, United States of America

3. Genome Center, University of California, Davis, Davis, California, United States of America

*KEYWORDS: Structure prediction, Rosetta Molecular Modeling Suite, Protein Symmetry.*

Figure S1 Plot showing the C alpha distance deviation from the target crystal structure to their corresponding templates versus the template percent identity

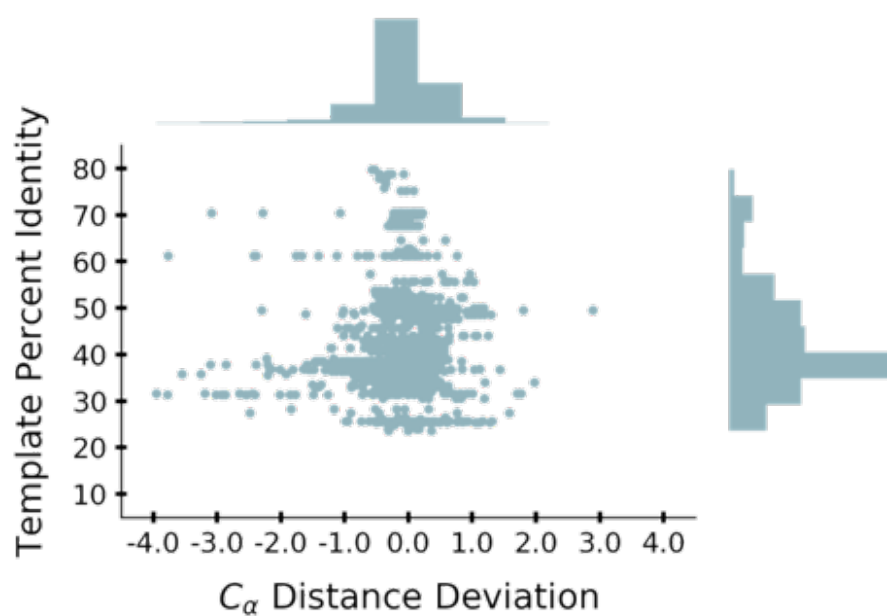

Figure S2 Visual representation as to how the distances used in the modeling were determined

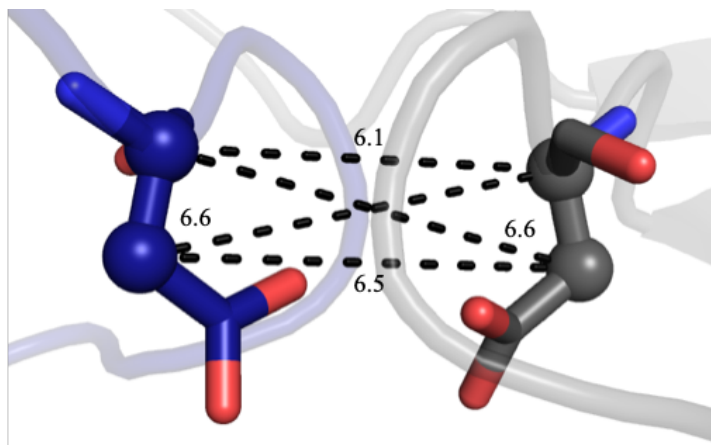

```
AtomPair CA 25 CA 124 SCALARWEIGHTEDFUNC 1 HARMONIC 6.08 0.6
AtomPair CB 25 CB 124 SCALARWEIGHTEDFUNC 1 HARMONIC 6.64 0.7
AtomPair CA 25 CB 124 SCALARWEIGHTEDFUNC 1 HARMONIC 6.57 0.7
AtomPair CA 124 CB 25 SCALARWEIGHTEDFUNC 1 HARMONIC 6.50 0.7
```

Table S1. The target pdb codes that had entries on the mechanism and catalytic atlas database

|                                            |           |  |                                            |           |  |                                            |           |
|--------------------------------------------|-----------|--|--------------------------------------------|-----------|--|--------------------------------------------|-----------|
| catalytic site atlas (reference pdb: 1ctt) | pdb: 1ctu |  | catalytic site atlas (reference pdb: 1a30) | pdb: 2o4p |  | catalytic site atlas (reference pdb: 5icd) | pdb: 4bnp |
| His 102A                                   | His 102A  |  | Asp 25A                                    | Asp 25A   |  | Tyr 160A                                   | Tyr 160A  |
| Glu 104A                                   | Glu 104A  |  | Asp 25B                                    | Asp 25B   |  | Lys 230A                                   | Lys 230B  |
| Cys 129A                                   | Cys 129A  |  |                                            |           |  | Asp 283A                                   | Asp 283B  |
| Cys 132A                                   | Cys 132A  |  | catalytic site atlas (reference pdb: 1rr6) | pdb: 2q7o |  | Asp 307A                                   | Asp 307A  |
|                                            |           |  | His 86A                                    | His 86A   |  |                                            |           |
| catalytic site atlas (reference pdb: 1dbt) | pdb: 1dqx |  | Ser 220A                                   | Ser220A   |  | catalytic site atlas (reference pdb: 2fua) | pdb: 4fua |
| Lys 33A                                    | Lys 59A   |  | Asn 243A                                   | Asn 243A  |  |                                            | Glu 73A   |
| Asp 60A                                    | Asp 91A   |  |                                            |           |  |                                            | His 92A   |
| Lys 62A                                    | Lys 93A   |  | catalytic site atlas (reference pdb: 1rr6) | pdb: 3bgs |  |                                            | His 94A   |
| Thr 123A                                   | Ser 154A  |  | His 86A                                    | His 86A   |  |                                            | His 155A  |
| Asp 65B                                    | Asp 96B   |  | Ser 220A                                   | Ser220A   |  |                                            | Tyr 113B  |
|                                            |           |  | Asn 243A                                   | Asn 243A  |  |                                            |           |
| catalytic site atlas (reference pdb: 1qin) | pdb: 1qin |  |                                            |           |  | catalytic site atlas (reference pdb: 1trk) | pdb: 5nd5 |
| Gln 33A                                    | Gln 33A   |  | catalytic site atlas (reference pdb: 1mcz) | pdb: 3fzn |  | His 263A                                   | His 315A  |
| Glu 99A                                    | Glu 99A   |  | Glu 28E                                    | Glu 28A   |  | Glu 418B                                   | Glu 463B  |
| His 126B                                   | His 126B  |  | His 70E                                    | His 70A   |  |                                            |           |
| Glu 172B                                   | Glu 172B  |  |                                            |           |  |                                            |           |

Table S2. The target pdb codes with the templates that were used for modeling

| Target | Templates used |      |      |      |      |      |      |      |      |      |
|--------|----------------|------|------|------|------|------|------|------|------|------|
| 1ctu   | lux0           | lux1 | 1zab | 2d30 | 3dmo | 3ijf | 3r2n | 4eg2 | 4wif | 4wig |
| 1dqx   | 1eix           | 2eaw | 2jgy | 2qcc | 2qcf | 3bk0 | 3bvj | 3ewx | 3ldv | 3tr2 |
| 1nki   | 1npb           | 1r9c | 2p7q | 4ir0 | 4jh1 | 4nay | 4nb1 | 5f6q | 5v3d | 5vb0 |
| 1ovm   | 1pvd           | 1pyd | 1qpb | 1zpd | 2vbf | 2vjy | 2vk1 | 2vk8 | 2w93 | 4cok |
| 1qin   | 1f9z           | 2c21 | 4hc5 | 4mtq | 5d7z |      |      |      |      |      |
| 1a59   | 3hwk           | 3o8j | 3tqg | 1iom | 1ixe |      |      |      |      |      |
| 2o4p   | 2p3d           | 3ggg | 3mws | 3t3c | 3ttp | 3u7s | 3ucb | 4z4x | 5b18 | 5t2e |
| 2q7o   | 1tcu           | 1vmk | 2p4s | 3khs | 3la8 | 4lna | 4m1e | 5cxq | 5cxs | 5ifk |
| 2vbg   | 1ovm           | 1pvd | 1pyd | 1qpb | 2vjy | 2vk1 | 2vk8 | 2w93 | 4cok | 5euj |
| 3bgs   | 1tcu           | 1vmk | 2p4s | 3khs | 3la8 | 4lna | 4m1e | 5cxq | 5cxs | 5ifk |
| 3fuc   | 1tcu           | 2p4s | 3khs | 3la8 | 4lna | 4m1e | 4ns1 | 5cxq | 5cxs | 5ifk |
| 3fzn   | 1jsc           | 2ag0 | 2pan | 2uz1 | 3d7k | 3iae | 4k9q | 4q9d | 4qpz | 5fem |
| 3mng   | 1tp9           | 2wfc | 2xhf | 3uma | 4f82 | 5k1g | 5k2i |      |      |      |
| 4bnp   | 1hqs           | 1x0l | 1xkd | 2d4v | 2dht | 2iv0 | 3ah3 | 3asj | 3dms |      |
| 4fua   | 1jdi           | 1k0w | 2fk5 | 2irp | 2opi | 3ocr | 4c24 | 4c25 | 4m6r | 4xxf |
| 4hgo   | 1j8d           | 2r8x | 3i6b | 3ij5 | 3mmz | 3mn1 | 3n07 | 3n1u | 4nav | 4um5 |
| 5nd5   | 1ay0           | 1gpu | 1itz | 1qgd | 1r9j | 1tka | 2e6k | 2r8o | 3hyl | 5hht |

Table S3. The target pdb codes with the number of chains the biological unit has and the corresponding top template used for modeling with the number of chains the biological unit the template has

| target | bio chains | top template | pid  | bio chains |
|--------|------------|--------------|------|------------|
| 1ctu   | 2          | 4eg2         | 48.6 | 2          |
|        |            |              |      |            |
| 1dqx   | 2          | 2qcc         | 52.3 | 2          |
|        |            |              |      |            |
| 1nki   | 2          | 5v3d         | 67.7 | 2          |
|        |            |              |      |            |
| 1ovm   | 4          | 2vbf         | 41.4 | 2          |
|        |            |              |      |            |
| 1qin   | 2          | 4mtq         | 42.1 | 2          |
|        |            |              |      |            |
| 1a59   | 2          | 3hwk         | 59.8 | 2          |
|        |            |              |      |            |
| 2o4p   | 2          | 5t2e         | 79.8 | 2          |
|        |            |              |      |            |
| 2q7o   | 3          | 2p4s         | 55.8 | 3          |
|        |            |              |      |            |
| 2vbg   | 2          | 1ovm         | 41.4 | 4          |
|        |            |              |      |            |
| 3bgs   | 3          | 2p4s         | 55.8 | 3          |
|        |            |              |      |            |
| 3fuc   | 3          | 2p4s         | 55.6 | 3          |
|        |            |              |      |            |
| 3fzn   | 4          | 4q9d         | 44.5 | 4          |
|        |            |              |      |            |
| 3mng   | 2          | 2wfc         | 64.6 | 2          |
|        |            |              |      |            |
| 4bnp   | 2          | 3dms         | 75.2 | 2          |
|        |            |              |      |            |
| 4fua   | 4          | 4c24         | 43.4 | 4          |
|        |            |              |      |            |
| 4hgo   | 4          | 3mn1         | 43.1 | 4          |
|        |            |              |      |            |
| 5nd5   | 2          | 1itz         | 68.5 | 2          |

Table S4. Details about the sampling of the conformational library and constraints. The atoms in the ligands were allowed to sample all conformer space with the exception that contained the cofactor thiamine pyrophosphate. The pyrophosphate functional group atoms were frozen. The conformation library of the ligands generated was used to dock into the models.

| pdb code ligand           | Description for conformational library                                                                      |
|---------------------------|-------------------------------------------------------------------------------------------------------------|
| 1ovm, 2vbg,<br>3fzn, 5nd5 | The pyrophosphate region was frozen                                                                         |
| 4hgo                      | The vanadium was changed to a phosphorous atom because Rosetta does not have that atom type in it's library |

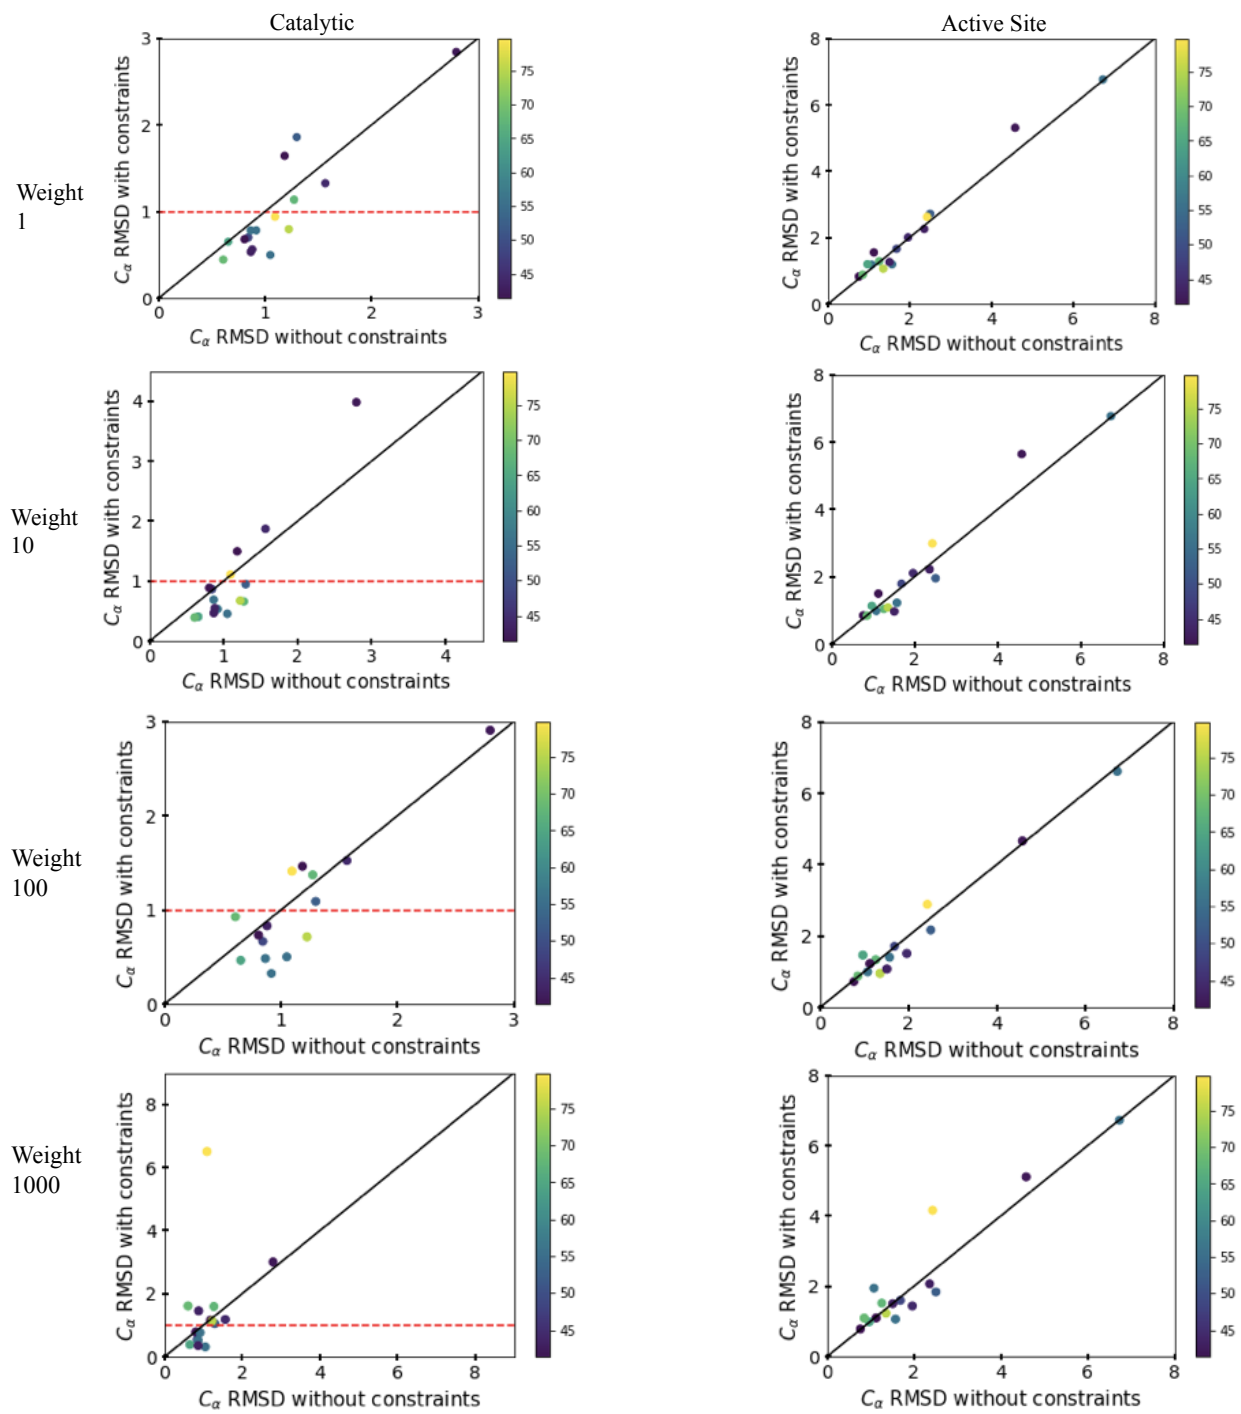

Figure S3 The analysis performed on the models with the weights of 1, 10, 100, 1000

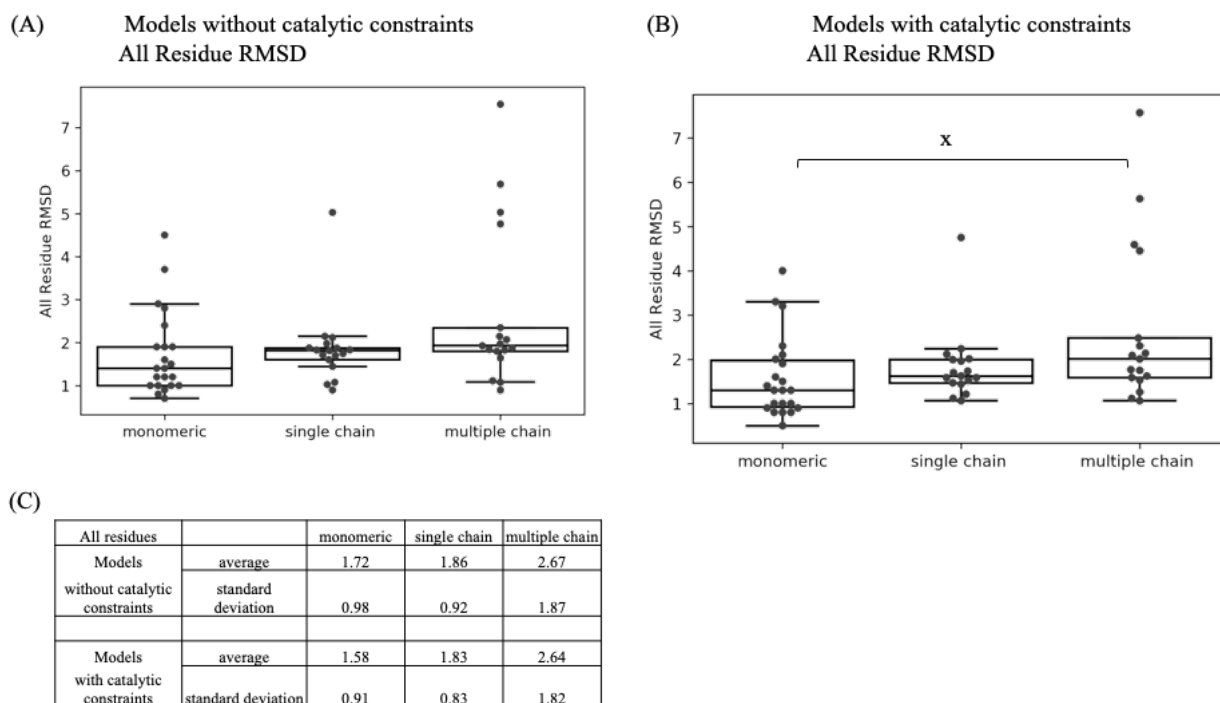

Figure S4. Boxplots comparing the RMSD of all residues between the monomeric and homomeric benchmarks. Each point in (A) and (B) represents the average RMSD of all residues for the lowest five models. The single chain represents the RMSD of only the single chain between the crystal structures or models within the homomeric benchmark. The multiple chains represent the RMSD analysis between all chains of the crystal structures or models within the homomeric benchmark. The X correspond to a p-value < 0.05. (A) Analysis between the target crystal structure to models without catalytic constraints (B) Analysis between the target crystal structure to models with catalytic constraints (C) A table of the average and standard deviation for the boxplots in A - B



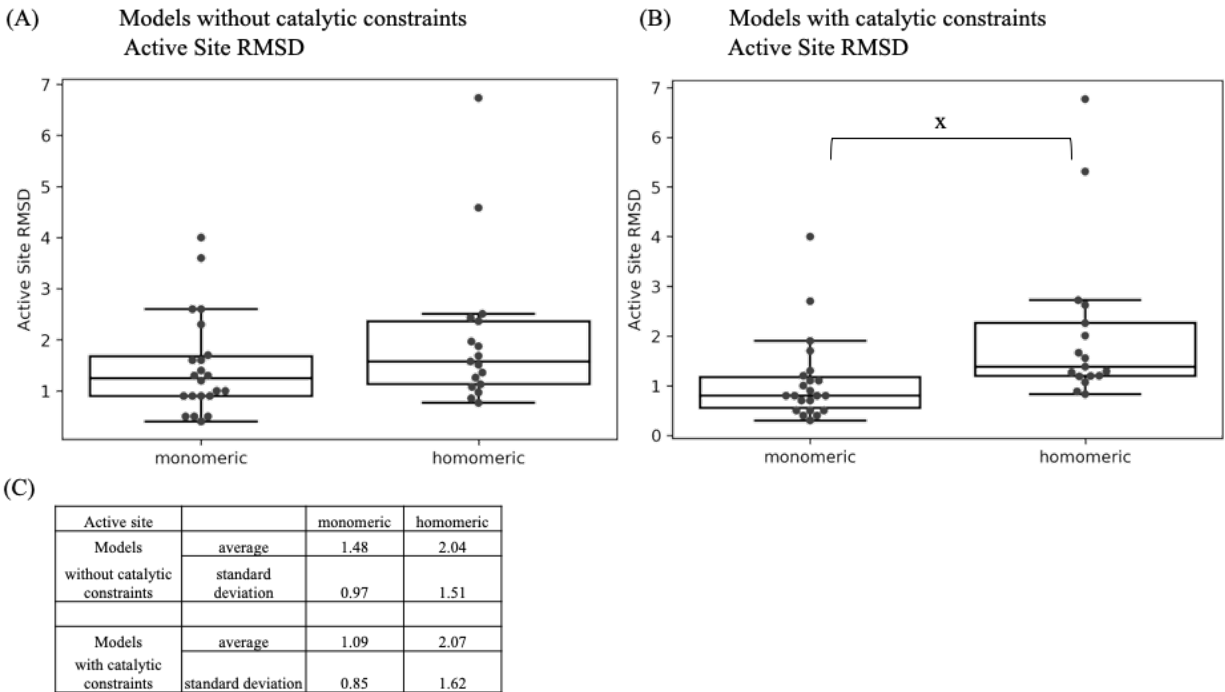

Figure S5. Boxplots comparing the RMSD of all residues between the monomeric and homomeric benchmarks. Each point in (A) and (B) represents the average RMSD of active site residues for the lowest five models. The single chain represents the RMSD of only the single chain between the crystal structures or models within the homomeric benchmark. The multiple chains represents the RMSD analysis between all chains of the crystal structures or models within the homomeric benchmark. The X correspond to a p-value < 0.05. (A) Analysis between the target crystal structure to models without catalytic constraints (B) Analysis between the target crystal structure to models with catalytic constraints (C) A table of the average and standard deviation for the boxplots in A – B

Table S5. Statistical analysis of the all residue and active site RMSD using a two tailed t-test (A) all residues (B) active site residues

(A)

| All residues                         |         | Monomeric-single | Monomeric-multiple | Single-multiple |
|--------------------------------------|---------|------------------|--------------------|-----------------|
| Models without catalytic constraints | p-value | 0.64             | 0.069              | 0.075           |
| Models with catalytic constraints    | p-value | 0.39             | 0.039              | 0.081           |

(B)

| Active site                          |         | Monomeric-homomeric |
|--------------------------------------|---------|---------------------|
| Models without catalytic constraints | p-value | 0.20                |
| Models with catalytic constraints    | p-value | 0.033               |

Table S6. Number of conformations

| pdb  | number of rotamers |
|------|--------------------|
| 1nki | 1                  |
| 3mng | 3                  |
| 1ovm | 4                  |
| 5nd5 | 4                  |
| 1a59 | 10                 |
| 2vbg | 36                 |
| 4bnp | 81                 |
| 1ctu | 165                |
| 4fua | 243                |
| 3fuc | 319                |
| 3fzn | 322                |
| 1dqx | 1169               |
| 3bgs | 1455               |
| 2q7o | 3763               |
| 2o4p | 20505              |
| 4hgo | 44289              |
| 1qin | 54278              |

Figure S6 The crystal structure is depicted in a deep purple color with the models overlaid on top. The models are depicted in blue and dark gray. The crystal structure ligand is in a deep purple color and the ligand docked into the model is in a dark gray.

(A) 1ctu

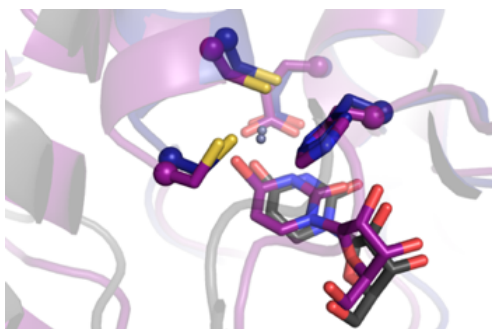

Ligand RMSD without constraints:  
1.91

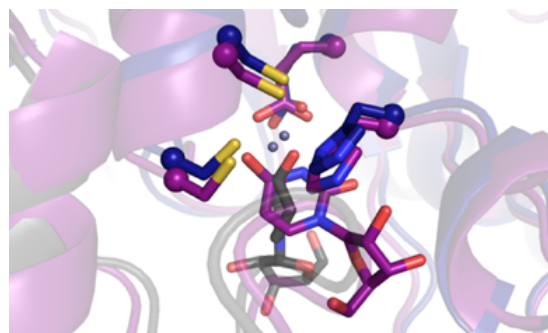

Ligand RMSD with constraints:  
5.65

(B) 1dqx

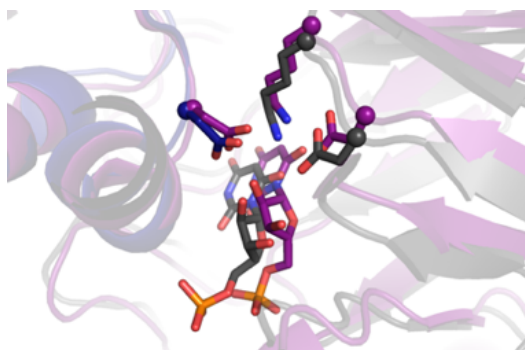

Ligand RMSD without constraints:  
3.15

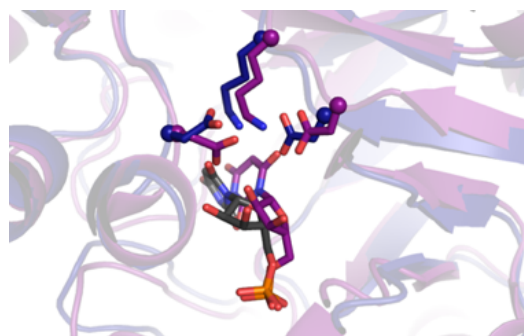

Ligand RMSD with constraints:  
5.53

(C) Inki

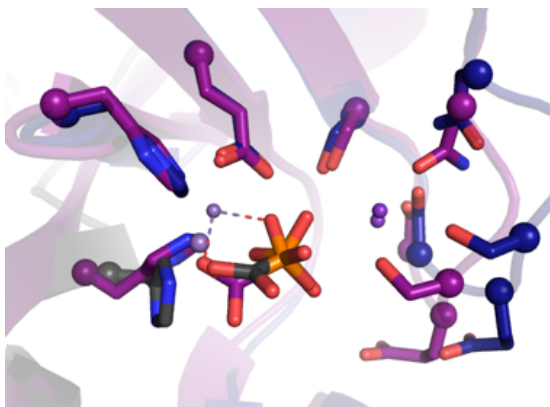

Ligand RMSD without constraints:  
2.47

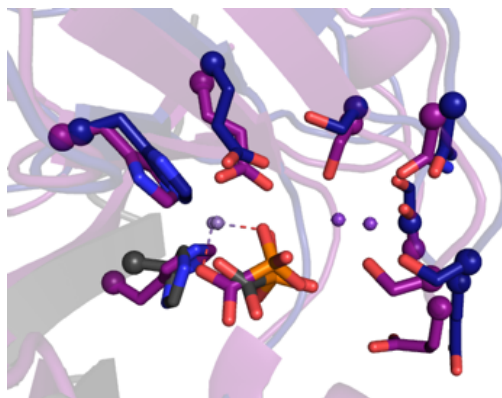

Ligand RMSD with constraints:  
2.34

(D) Iovm

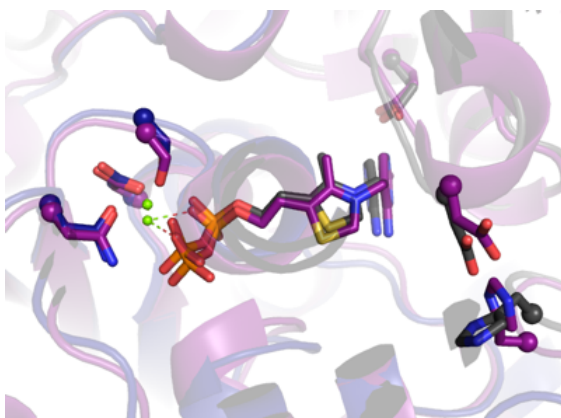

Ligand RMSD without constraints:  
1.01

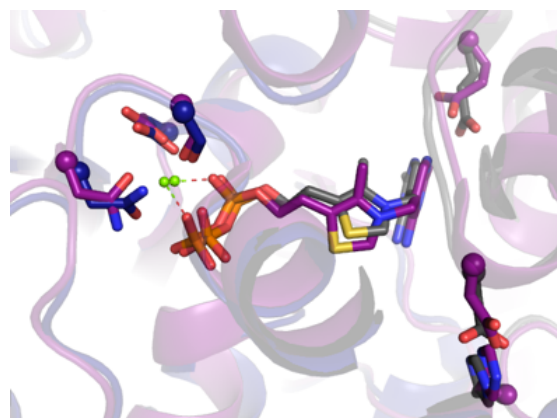

Ligand RMSD with constraints:  
1.16

(E) 1qin

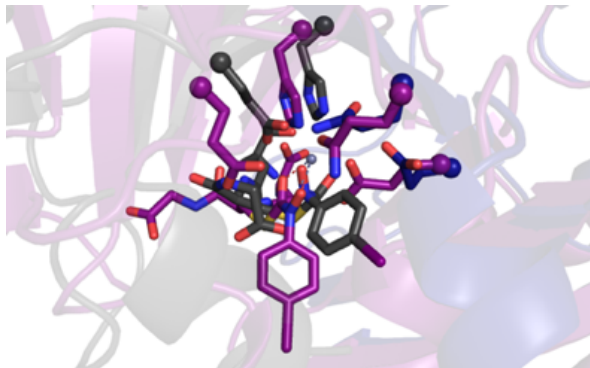

Ligand RMSD without constraints:  
6.68

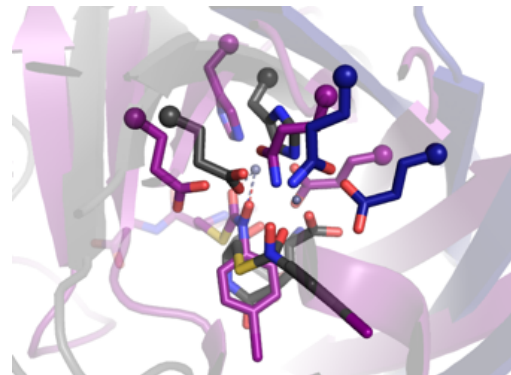

Ligand RMSD with constraints:  
8.05

(F) 2o4p

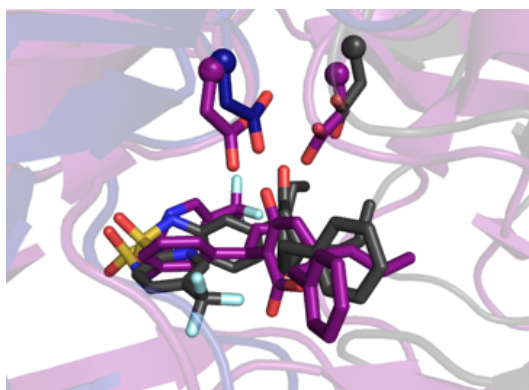

Ligand RMSD without constraints:  
10.15

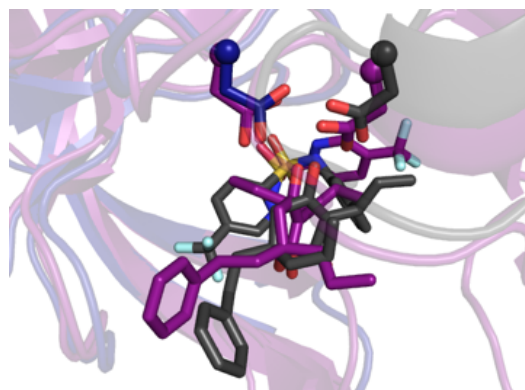

Ligand RMSD with constraints:  
9.91

(G) 2q7o

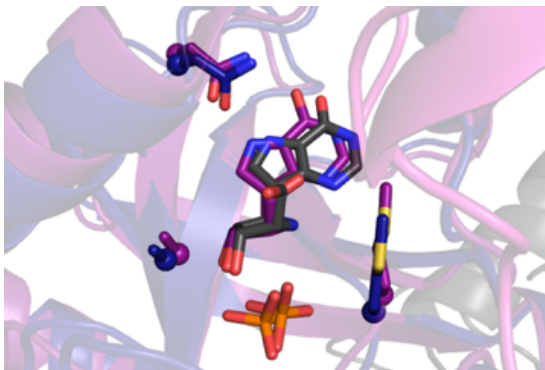

Ligand RMSD without constraints:  
1.37

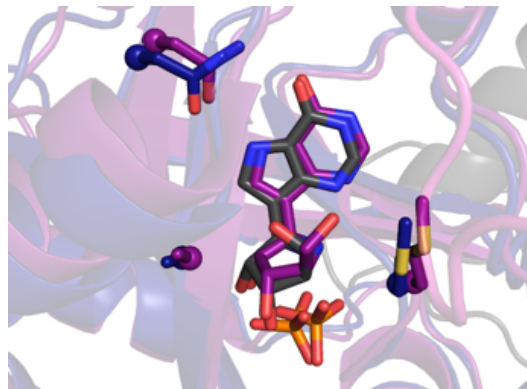

Ligand RMSD with constraints:  
1.36

(H) 2vbg

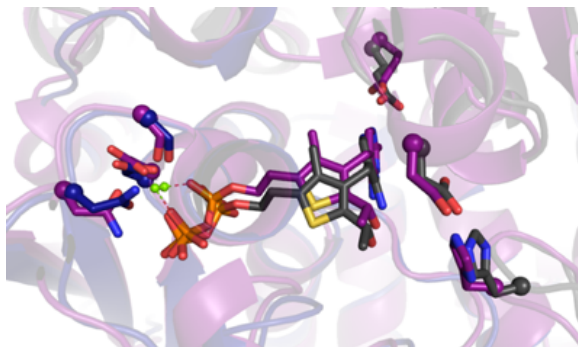

Ligand RMSD without constraints:  
1.14

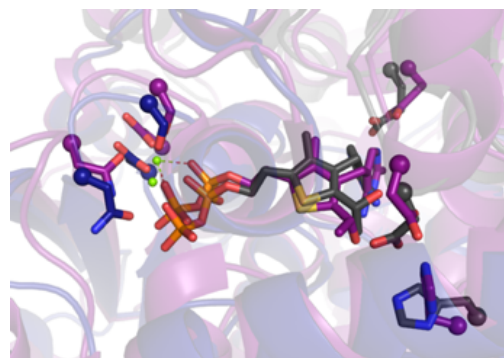

Ligand RMSD with constraints:  
1.58

(I) 3bgs

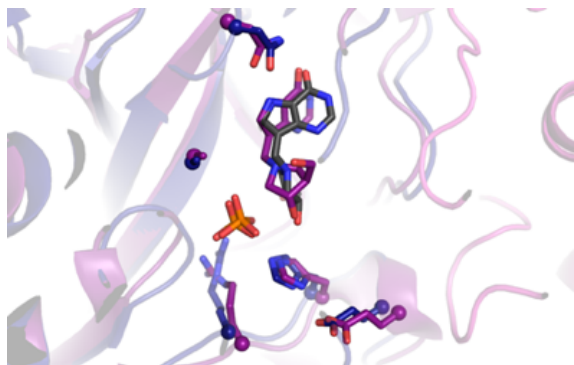

Ligand RMSD without constraints:  
3.27

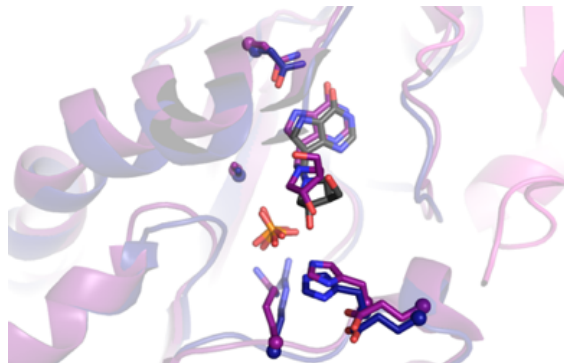

Ligand RMSD with constraints:  
1.20

(J) 3fuc

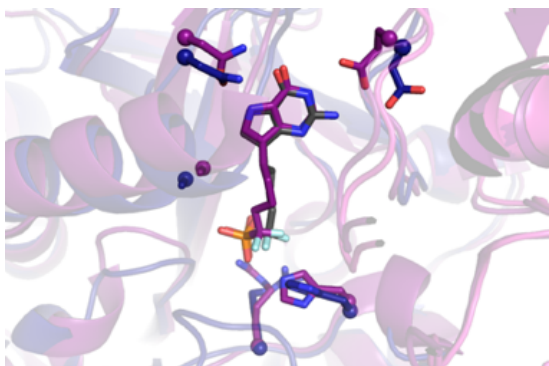

Ligand RMSD without constraints:  
2.28

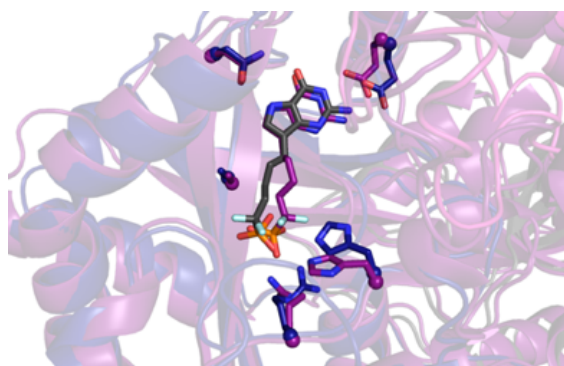

Ligand RMSD with constraints:  
1.62

(K) 3fzn

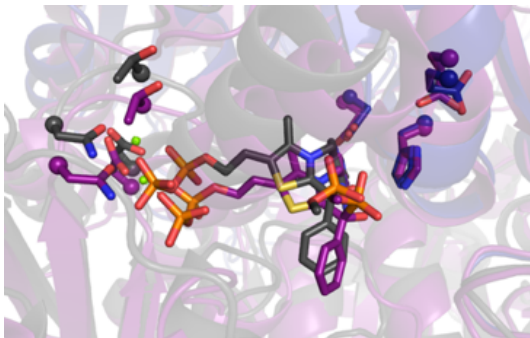

Ligand RMSD without constraints:  
3.05

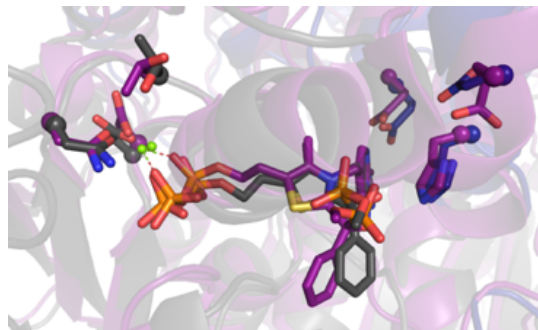

Ligand RMSD with constraints:  
2.95

(L) 3mng

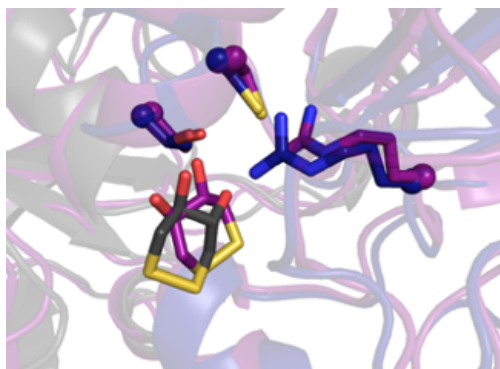

Ligand RMSD without constraints:  
2.17

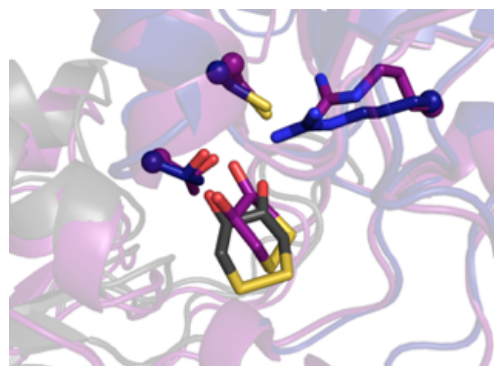

Ligand RMSD with constraints:  
1.90



(M) 4bnp

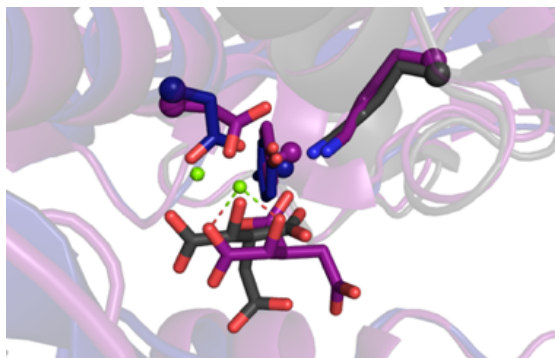

Ligand RMSD without constraints:  
2.69

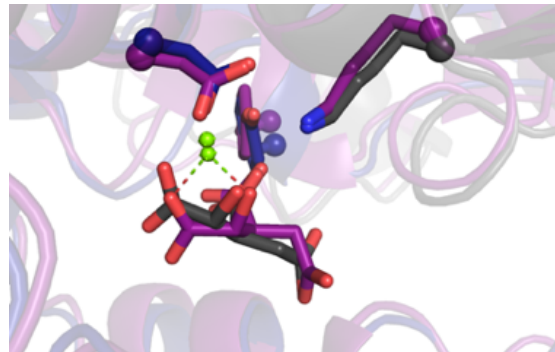

Ligand RMSD with constraints:  
1.76

(N) 4fua

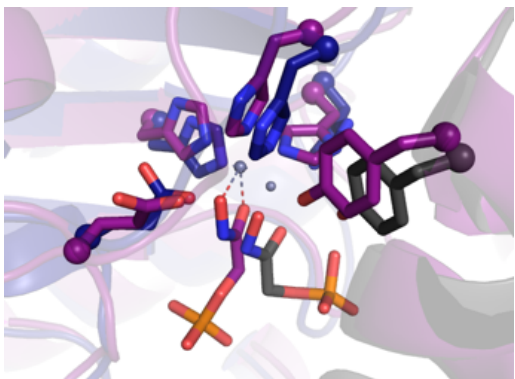

Ligand RMSD without constraints:  
3.71

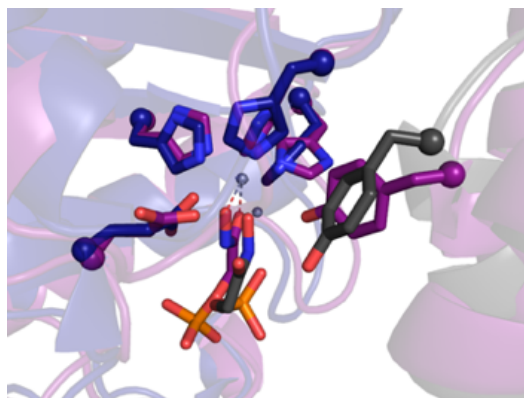

Ligand RMSD with constraints:  
3.96

(O) 4hgo

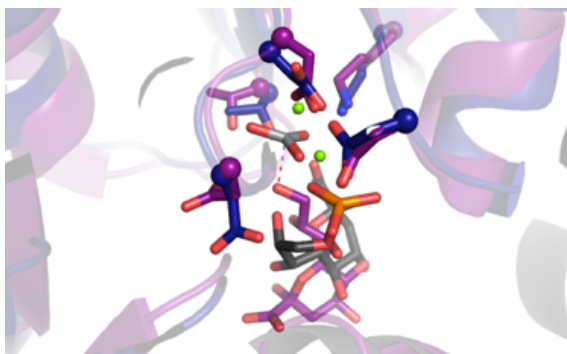

Ligand RMSD without constraints:  
6.10

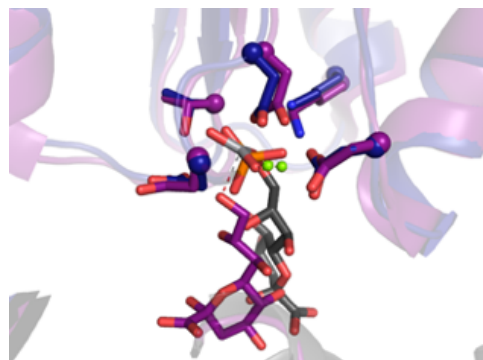

Ligand RMSD with constraints:  
5.60

(P) 5nd5

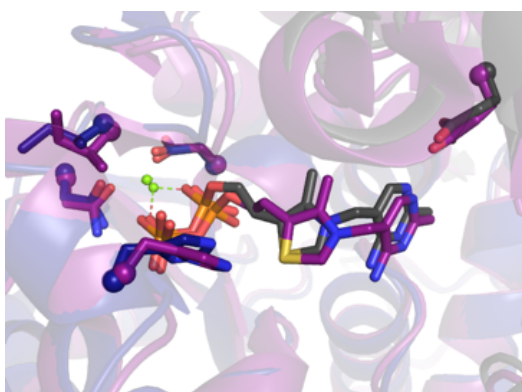

Ligand RMSD without constraints:  
1.34

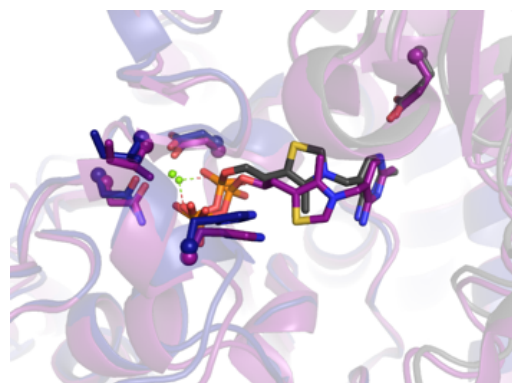

Ligand RMSD with constraints:  
1.51

(Q) 1a59

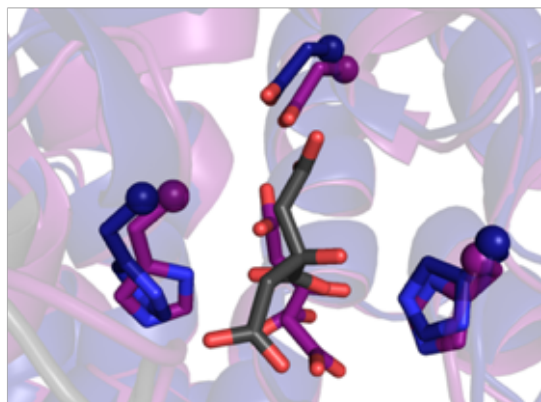

Ligand RMSD without constraints:  
3.37

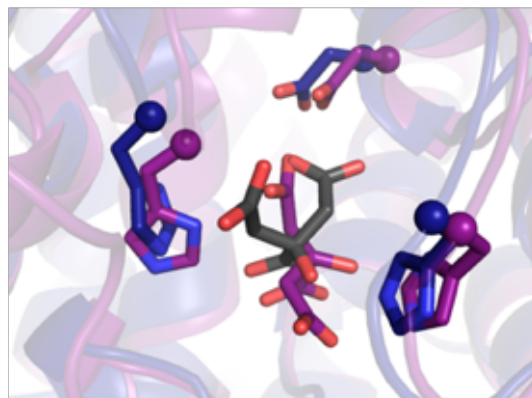

Ligand RMSD with constraints:  
3.07

Figure S7 The area of the active site highlighted with a red circle on the first cartoon representation of protein. The crystal structure is depicted in a deep purple color with the models overlaid on top in cartoon and ribbon form. Depending on the number of chains, the models are depicted in blue (chain A), dark gray (chain B), light blue (chain C), and light gray (chain D).

(a) 1ctu

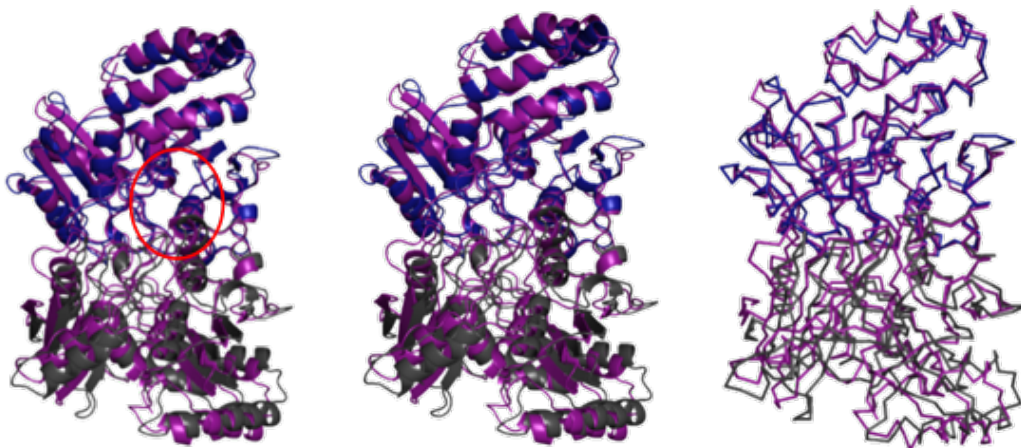

(b) 1dqx

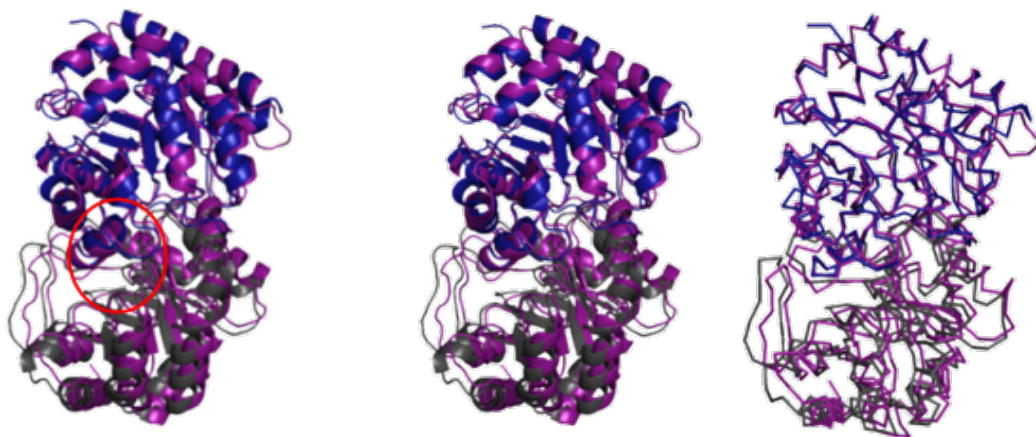

(c) 1nki

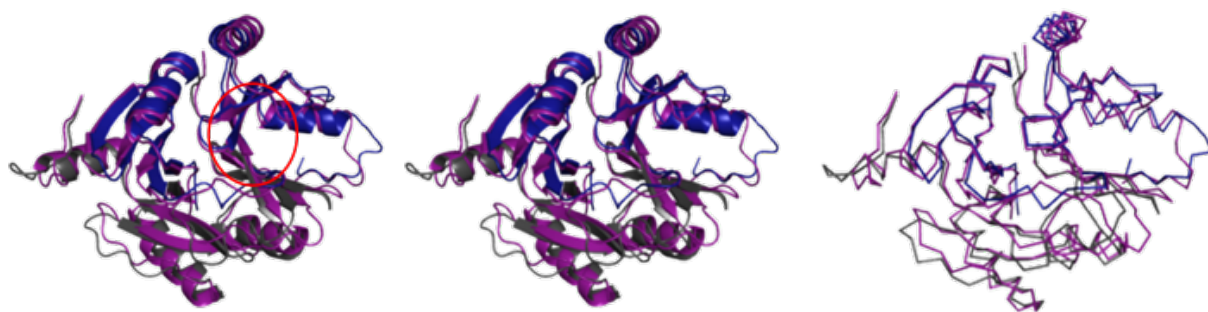

(d) 1ovm

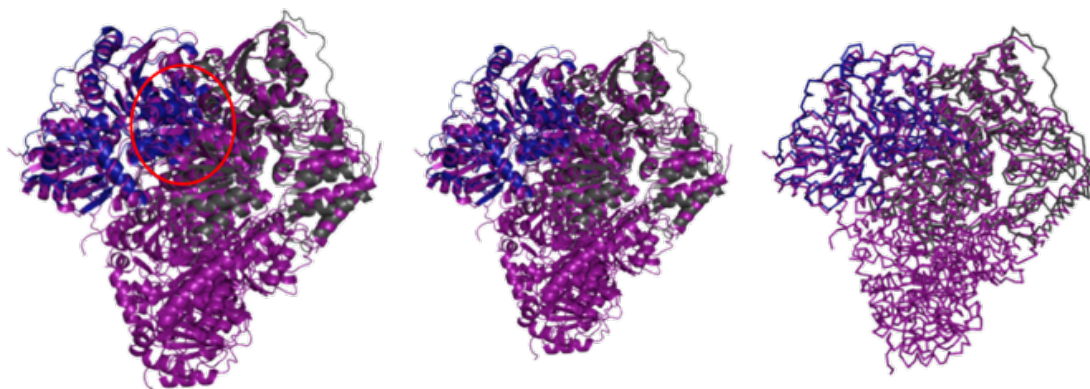

(e) 1qin

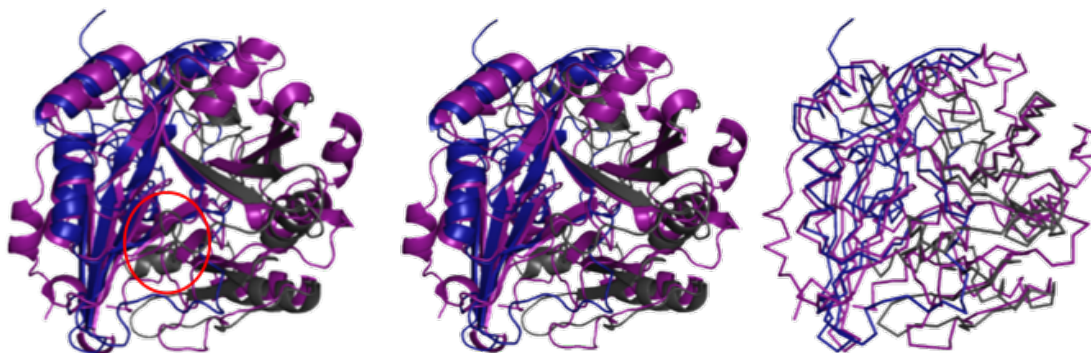

(f) 1a59

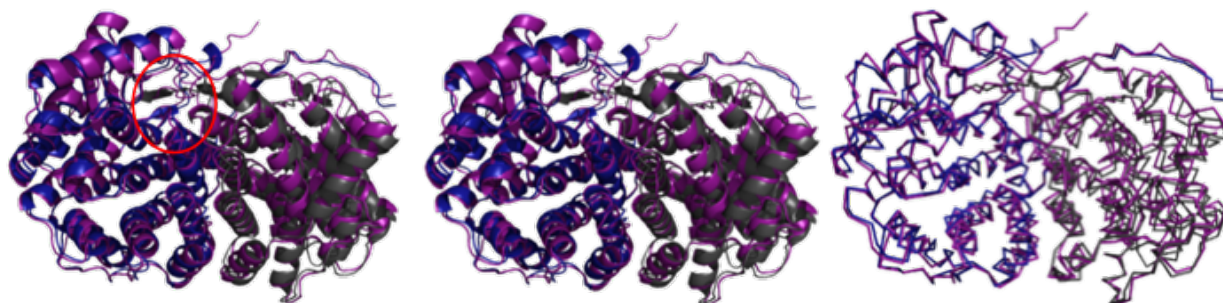

(g) 2o4p

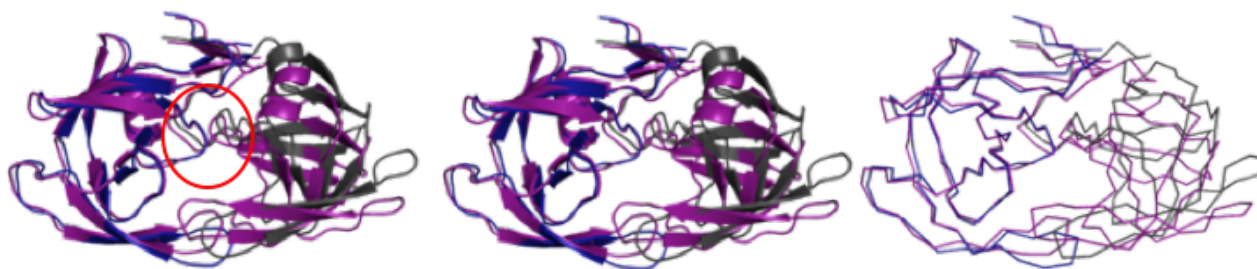

(h) 2q7o

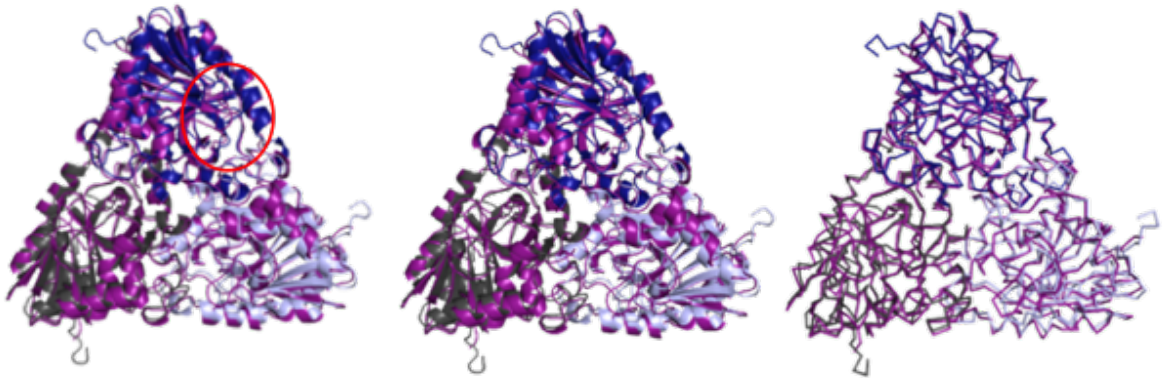

(i) 2vbg

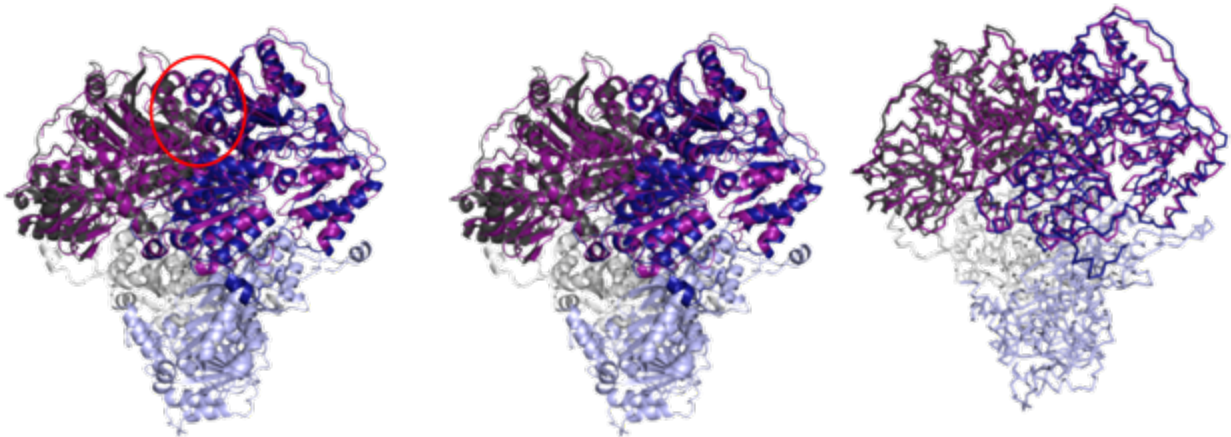

(j) 3bgs

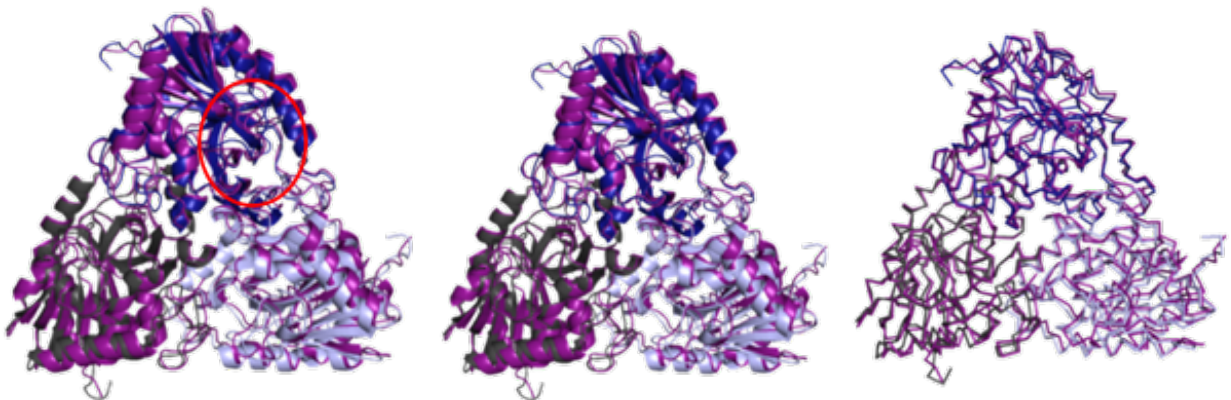

(k) 3fuc

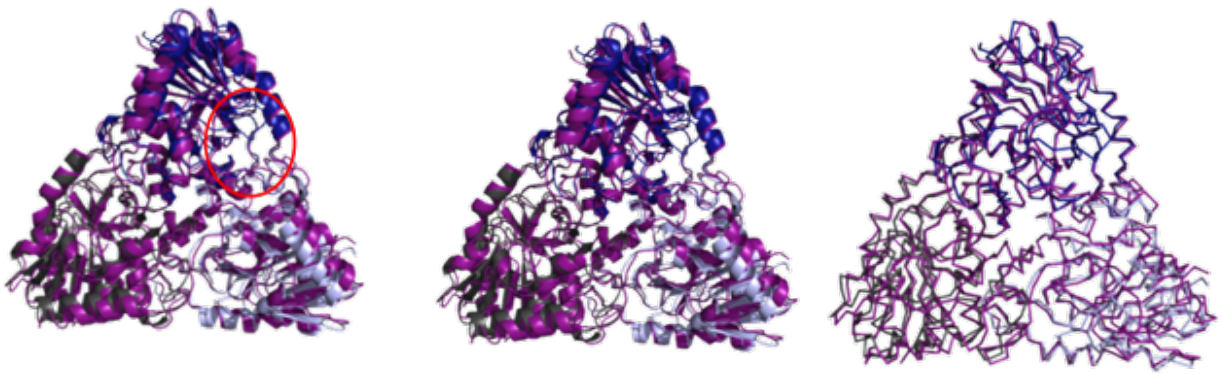

(l) 3fzn

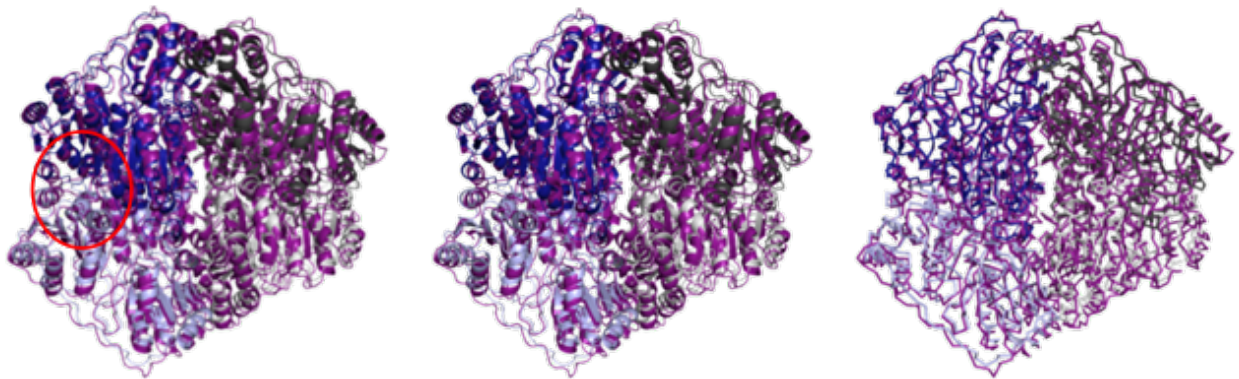

(m) 3mng

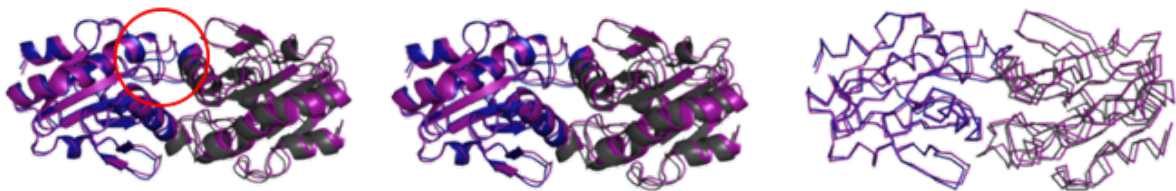

(n) 4bnp

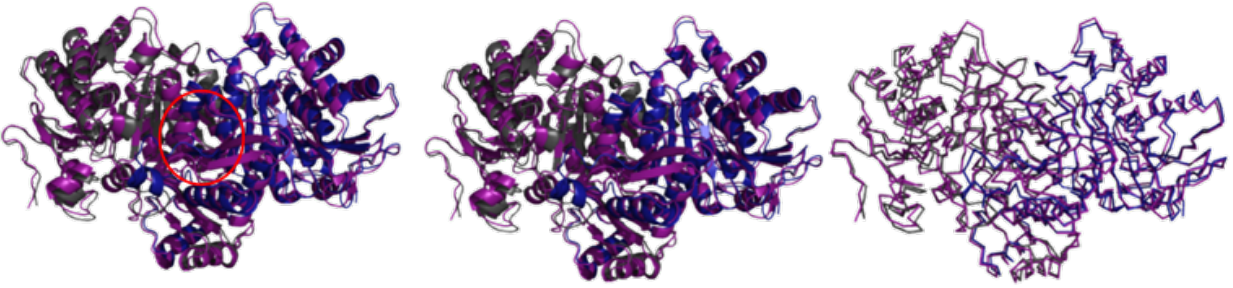

(o) 4fua

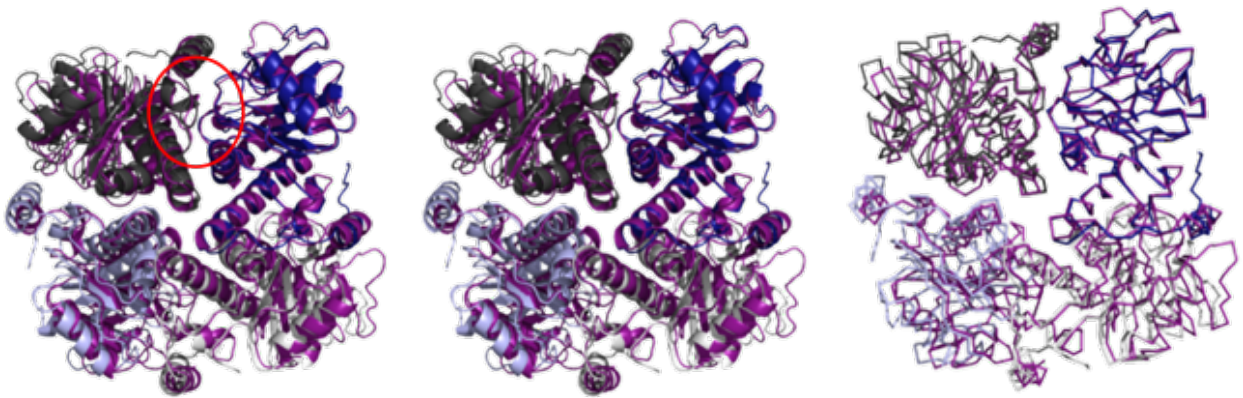

(p) 4hgo

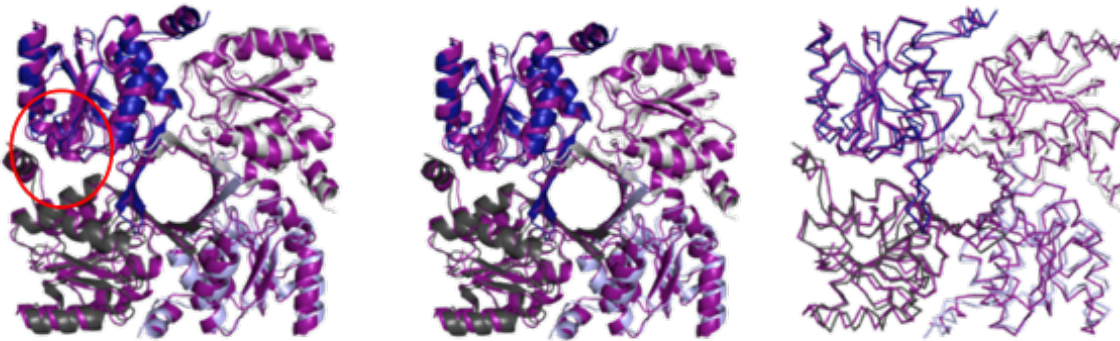



(q) 5nd5

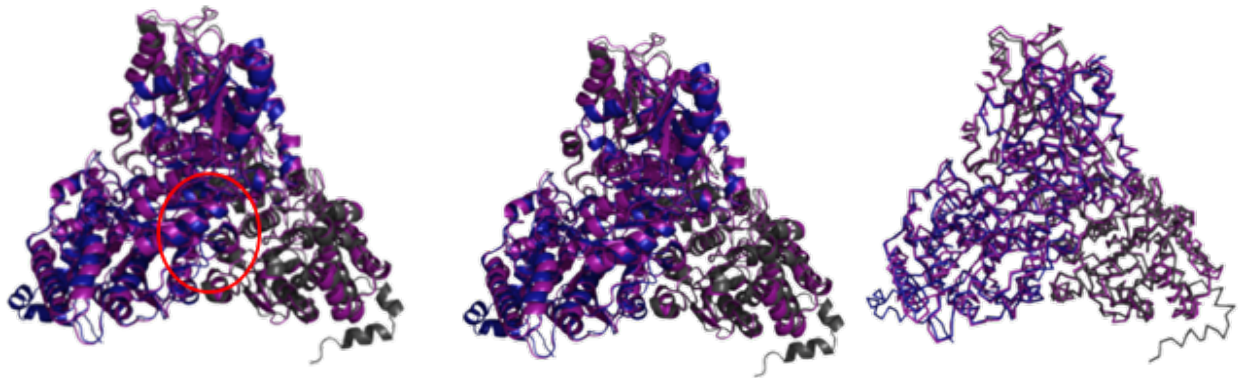

Supplement: ao9b02636_si_001.pdf [file ao9b02636_si_001.pdf]
